# Supplementary material for: Electromagnetic interference shielding material for super-broadband: multi-walled carbon nanotube/silver nanowire film with an ultrathin sandwich structure
Source: Royal Society of Chemistry journal article supplement (doi:10.1039/d1ta08106c), 2021-01-01
Supplement: d1ta08106c1.pdf [file d1ta08106c1.pdf]

**Electromagnetic Interference Shielding Material for Super-broadband: Ultrathin, Sandwich  
structure Multi-walled Carbon Nanotube/Silver Nanowire Film**

Zheng Wang<sup>a, b</sup>, Qing-Qiang Kong<sup>a, b</sup>, Zong-Lin Yi<sup>a, b</sup>, Li-Jing Xie<sup>a, b</sup>, Hui Jia<sup>a, b</sup>, Jing-Peng Chen<sup>a, b</sup>,

Dong Liu<sup>a, b</sup>, Dong Jiang<sup>a, c\*</sup>, Cheng-Meng Chen<sup>a, c\*</sup>

<sup>a</sup> CAS Key Laboratory of Carbon Materials, Institute of Coal Chemistry, Chinese Academy of Sciences, 27 Taoyuan South Road, Taiyuan 030001, China

<sup>b</sup> University of Chinese Academy of Sciences, 19 Yuquan Road, Beijing 100049, China

<sup>c</sup> Center of Materials Science and Optoelectronics Engineering, University of Chinese Academy of Sciences, Beijing 100049, China

\*Corresponding authors

E-mail addresses: [jdred@sxicc.ac.cn](mailto:jdred@sxicc.ac.cn) (Dong Jiang)

[ccm@sxicc.ac.cn](mailto:ccm@sxicc.ac.cn) (Cheng-Meng Chen)

## Supporting information

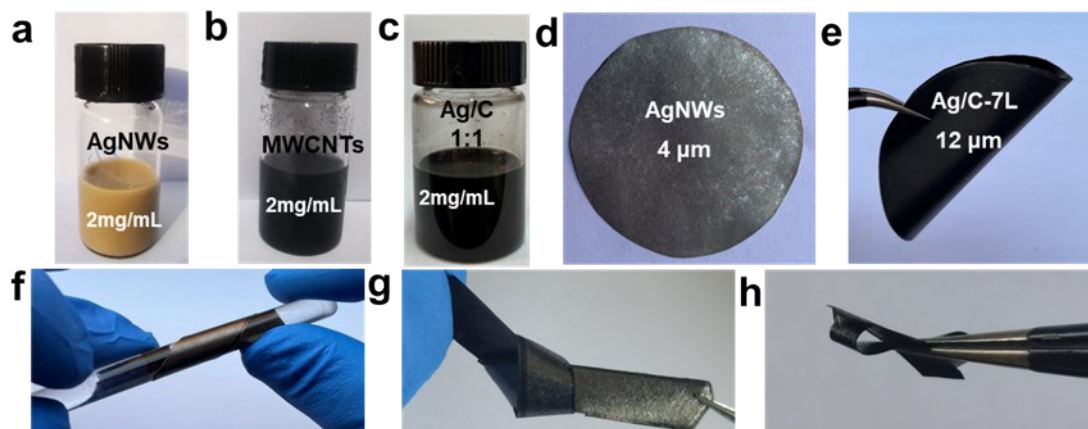

**Figure S1.** Digital photos of the building blocks of (a) AgNWs, (b) MWCNTs, and (c) Ag/C-PM. Digital photos of (d) AgNWs films and (e) Ag/C-7L. (f-h) Digital photograph of Ag/C-7L film with the state of twisting and buckling.

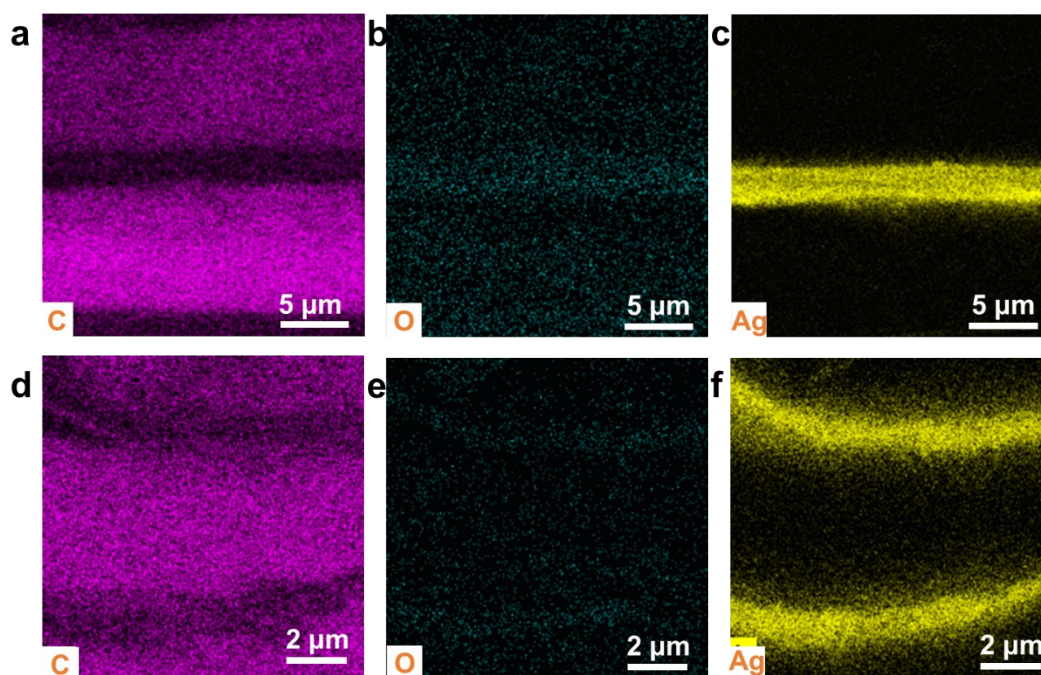

**Fig. S2.** Elemental mapping of (a-c) the Ag/C-3L film; Elemental mapping of (d-e) the Ag/C-5L film

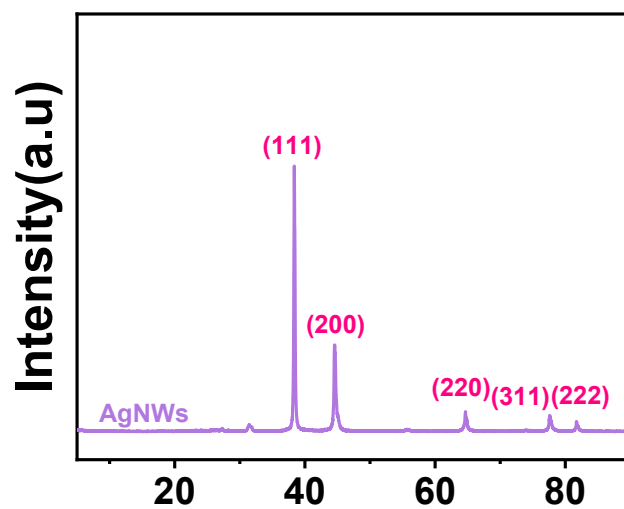

**Figure S3.** XRD spectra Ag NWs.

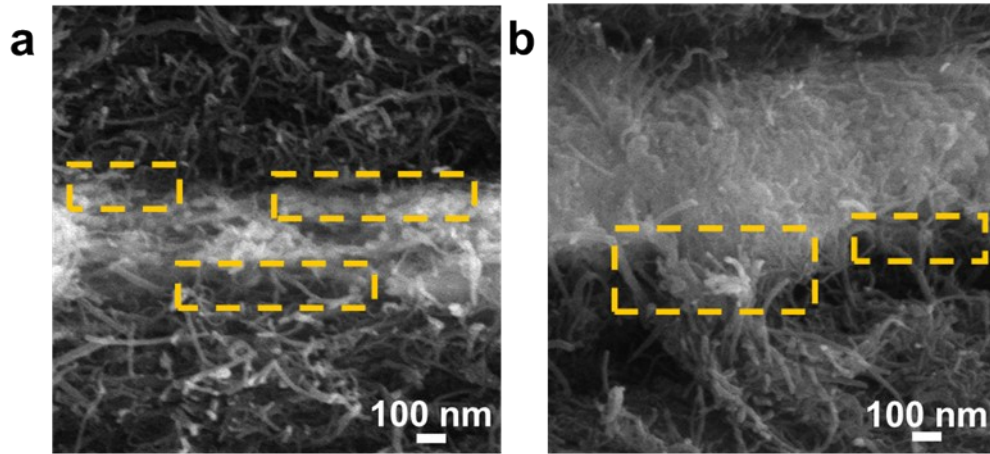

Figure S4. Cross-sectional SEM image of (a–b) the Ag/C-7L film.

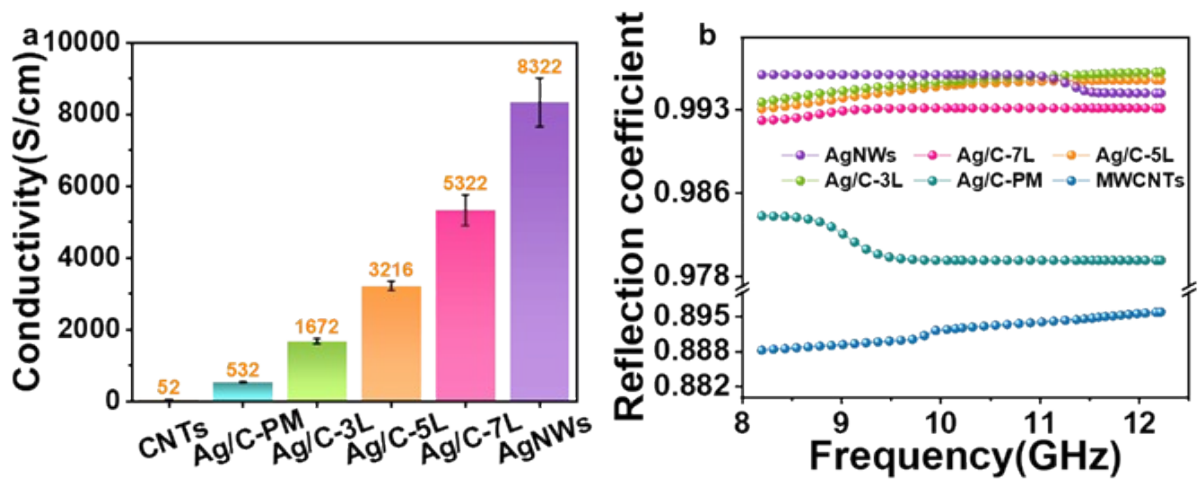

Figure S5 (a) Conductivity of all samples. (b) Reflection coefficient (R)

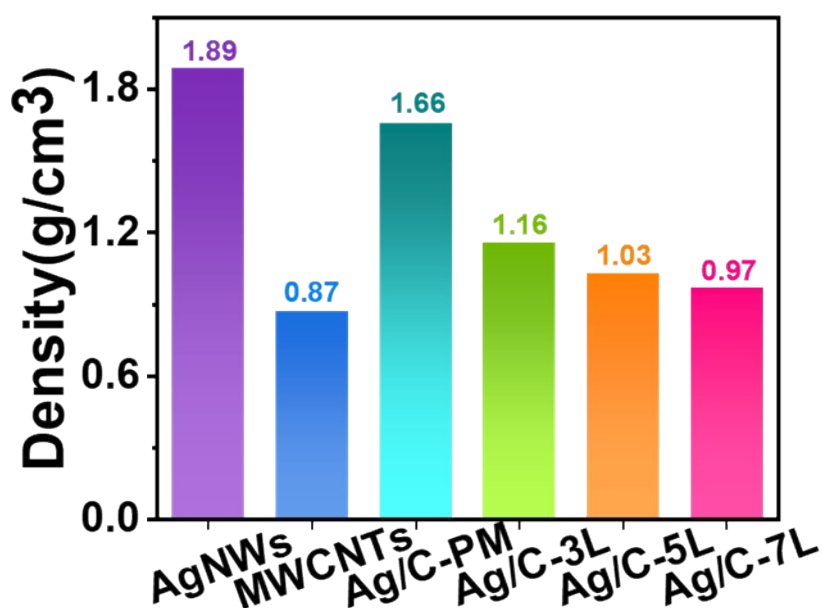

**Figure S6.** The density of Ag NWs, MWCNTs, Ag/C-PM, Ag/3L, Ag/C-5L, and Ag/C-7L films.

**Table S1.** Performance comparison of the current work of representative hollow-structure composites

| Number | Samples                     | EMI SE (dB) | Thickness ( $\mu\text{m}$ ) | EMI SE/t (dB/mm) | Ref. |
|--------|-----------------------------|-------------|-----------------------------|------------------|------|
| 1      | MWCNT/cellulose/Ag NWs film | 23.8        | 154                         | 155              | 1    |
| 2      | rGO/Ag NWs                  | 24.0        | 100                         | 240              | 2    |
| 3      | graphene/Ag NWs/graphene    | 38.0        | 10                          | 3800             | 3    |
| 4      | graphene/Ag NWs film        | 38.5        | 30                          | 1283             | 4    |
| 5      | MWCNTs/Ag NWs-PVDF          | 70.0        | 1174                        | 60               | 5    |
| 6      | CNTs/Polyurethane           | 43.5        | 2000                        | 29               | 6    |

|    |                                |      |      |       |               |
|----|--------------------------------|------|------|-------|---------------|
| 7  | PVDF/CNTs/Ni@CNTs<br>film      | 51.4 | 500  | 103   | 7             |
| 8  | Al foil                        | 66.0 | 8    | 8250  | 8             |
| 9  | Cu foil                        | 70.0 | 10   | 7000  | 8             |
| 10 | MXene foam                     | 32.0 | 6    | 5333  | 9             |
| 11 | MXene/Nanocellulose film       | 24.0 | 47   | 511   | 10            |
| 12 | MXene/RGO-epoxy solids         | 56.4 | 2000 | 28    | 11            |
| 13 | MXene/CNT aerogel              | 62.8 | 1000 | 63    | 12            |
| 14 | Graphene/PMMA foam             | 19.0 | 2400 | 8     | 13            |
| 15 | Carbon/Graphene foam           | 24.0 | 24   | 1000  | 14            |
| 16 | Graphene foam                  | 25.0 | 300  | 83    | 15            |
| 17 | MWCNT/WPU                      | 24.0 | 50   | 480   | 16            |
| 18 | SWCNT/epoxy                    | 25.0 | 2000 | 13    | 17            |
| 19 | Ag NW/PANI                     | 48.0 | 13   | 308   | 18            |
| 20 | Ag NW/epoxy                    | 25.0 | 40   | 625   | 19            |
| 21 | Ag NW/PVA                      | 30.0 | 40   | 750   | 19            |
| 22 | Ag NW/PS                       | 32.0 | 800  | 40    | 20            |
| 23 | Cu NW/PS                       | 35.0 | 210  | 167   | 21            |
| 24 | MWCNT/<br>Ag NWs/MWCNT<br>film | 72.0 | 12   | 60080 | This<br>works |

---

## References

- 1 X. Liang, J. Lu, T. Zhao, X. Yu, Q. Jiang, Y. Hu, P. Zhu, R. Sun and C. Wong, *Adv. Mater. Interfaces*, 2018, 1801635.
- 2 Y. Yang, S. Chen, W. Li, P. Li, J. Ma, B. Li, X. Zhao, Z. Ju, H. Chang, L. Xiao, H. Xu and Y. Liu, *ACS Nano*, 2020, **14**, 8754–8765.
- 3 R. R. da Silva, M. Yang, S.-I. Choi, M. Chi, M. Luo, C. Zhang, Z.-Y. Li, P. H. C. Camargo, S. J. L. Ribeiro and Y. Xia, *ACS Nano*, 2016, **10**, 7892–7900.
- 4 T. K. Gupta, B. P. Singh, V. N. Singh, S. Teotia, A. P. Singh, I. Elizabeth, S. R. Dhakate, S. K. Dhawan and R. B. Mathur, *J. Mater. Chem. A*, 2014, **2**, 4256.
- 5 M. Sang, S. Wang, S. Liu, M. Liu, L. Bai, W. Jiang, S. Xuan and X. Gong, *ACS Appl. Mater. Interfaces*, 2019, **11**, 47340–47349.
- 6 W.-C. Yu, T. Wang, Y.-H. Liu, Z.-G. Wang, L. Xu, J.-H. Tang, K. Dai, H.-J. Duan, J.-Z. Xu and Z.-M. Li, *Chem. Eng. J.*, 2020, **393**, 124644.
- 7 S. Zeng, X. Li, M. Li, J. Zheng, S. E, W. Yang, B. Zhao, X. Guo and R. Zhang, *Carbon*, 2019, **155**, 34–43.
- 8 F. Shahzad, M. Alhabeab, C. B. Hatter, B. Anasori, S. Man Hong, C. M. Koo and Y. Gogotsi, *Science*, 2016, **353**, 1137–1140.
- 9 W. Yuan, J. Yang, F. Yin, Y. Li and Y. Yuan, *Compos. Commun.*, 2020, **19**, 90–98.
- 10 C. Weng, T. Xing, H. Jin, G. Wang, Z. Dai, Y. Pei, L. Liu and Z. Zhang, *Compos. Part Appl. Sci. Manuf.*, 2020, **135**, 105927.
- 11 J.-Q. Luo, S. Zhao, H.-B. Zhang, Z. Deng, L. Li and Z.-Z. Yu, *Compos. Sci. Technol.*, 2019, **182**, 107754.
- 12 P. Sambyal, A. Iqbal, J. Hong, H. Kim, M.-K. Kim, S. M. Hong, M. Han, Y. Gogotsi and C. M. Koo, *ACS Appl. Mater. Interfaces*, 2019, **11**, 38046–38054.
- 13 A. L. Dyer, E. J. Thompson and J. R. Reynolds, *ACS Appl. Mater. Interfaces*, 2011, **3**, 1787–1795.
- 14 Y. Li, B. Shen, X. Pei, Y. Zhang, D. Yi, W. Zhai, L. Zhang, X. Wei and W. Zheng, *Carbon*, 2016, **100**, 375–385.
- 15 B. Shen, Y. Li, D. Yi, W. Zhai, X. Wei and W. Zheng, *Carbon*, 2016, **102**, 154–160.
- 16 Z. Zeng, M. Chen, H. Jin, W. Li, X. Xue, L. Zhou, Y. Pei, H. Zhang and Z. Zhang, *Carbon*, 2016, **96**, 768–777.
- 17 Y. Huang, N. Li, Y. Ma, F. Du, F. Li, X. He, X. Lin, H. Gao and Y. Chen, *Carbon*, 2007, **45**, 1614–1621.
- 18 D. Zhang, J. Yang, Q. Jiang, L. Fu, Y. Xiao, Y. Luo and Z. Zhou, *J. Mater. Chem. A*, 2016, **4**, 4188–4193.
- 19 Y.-H. Yu, C.-C. M. Ma, C.-C. Teng, Y.-L. Huang, S.-H. Lee, I. Wang and M.-H. Wei, *Mater. Chem. Phys.*, 2012, **136**, 334–340.
- 20 M. Arjmand, A. A. Moud, Y. Li and U. Sundararaj, *RSC Adv.*, 2015, **5**, 56590–56598.
- 21 M. H. Al-Saleh, G. A. Gelves and U. Sundararaj, *Compos. Part Appl. Sci. Manuf.*, 2011, **42**, 92–97.
